# Supplementary material for: The aryl hydrocarbon receptor promotes differentiation during mouse preimplantational embryo development
Source: PubMed Central journal article supplement (PMC8452532; doi:10.1016/j.stemcr.2021.08.002), 2021-09-02
Supplement: mmc1.pdf [file mmc1.pdf]

**Stem Cell Reports, Volume 16**

**Supplemental Information**

**The aryl hydrocarbon receptor promotes differentiation during mouse preimplantational embryo development**

**Ana Nacarino-Palma, Francisco J. González-Rico, Claudia M. Rejano-Gordillo, Ana Ordiales-Talavera, Jaime M. Merino, and Pedro M. Fernández-Salguero**

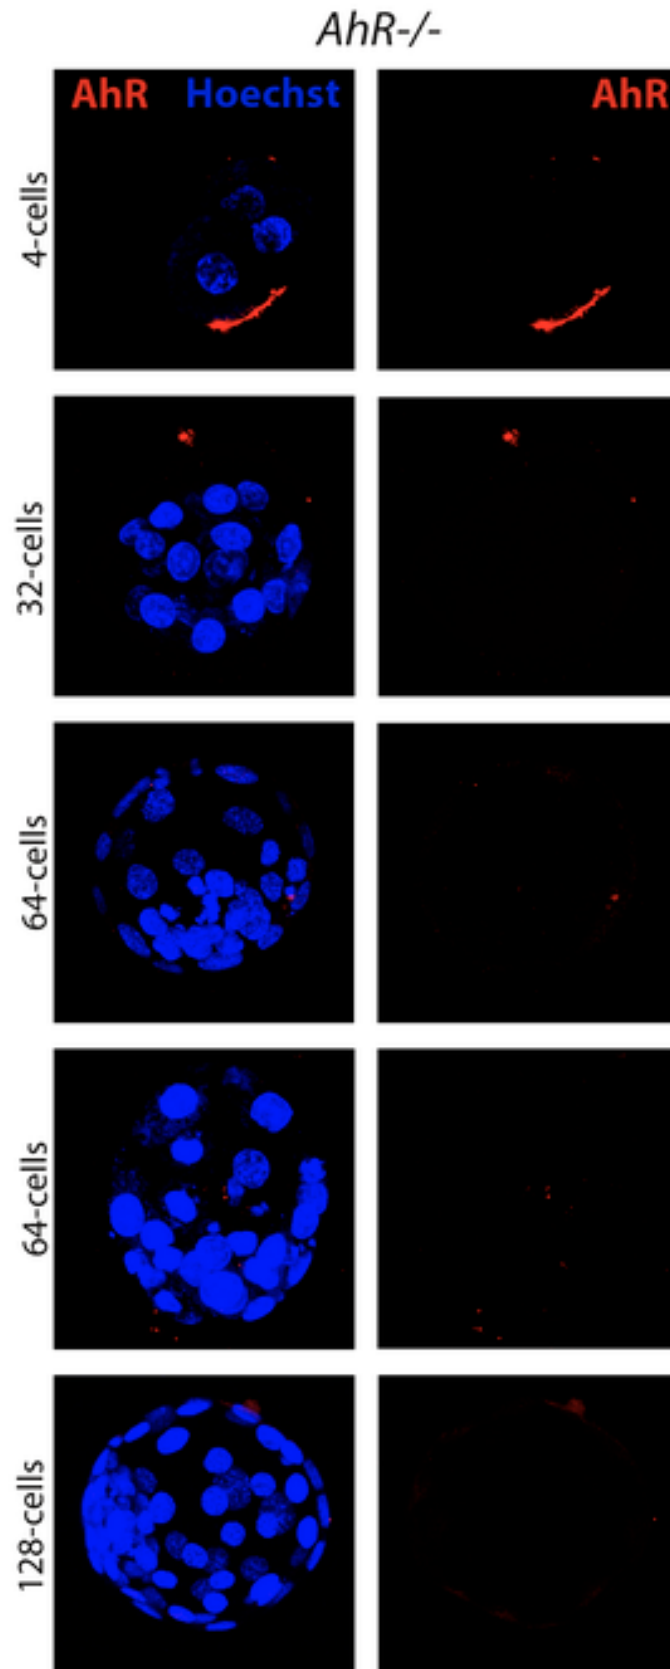

Supplementary Figure 1. AhR expression was determined in 4-cells, 32-cells, 64-cells and 128-cells *AhR*-null mouse embryos by immunofluorescence. Hoechst staining was used to label cell nuclei. Confocal microscopy was used for detection using an Olympus FV1000 confocal microscope.

FIGURE 8

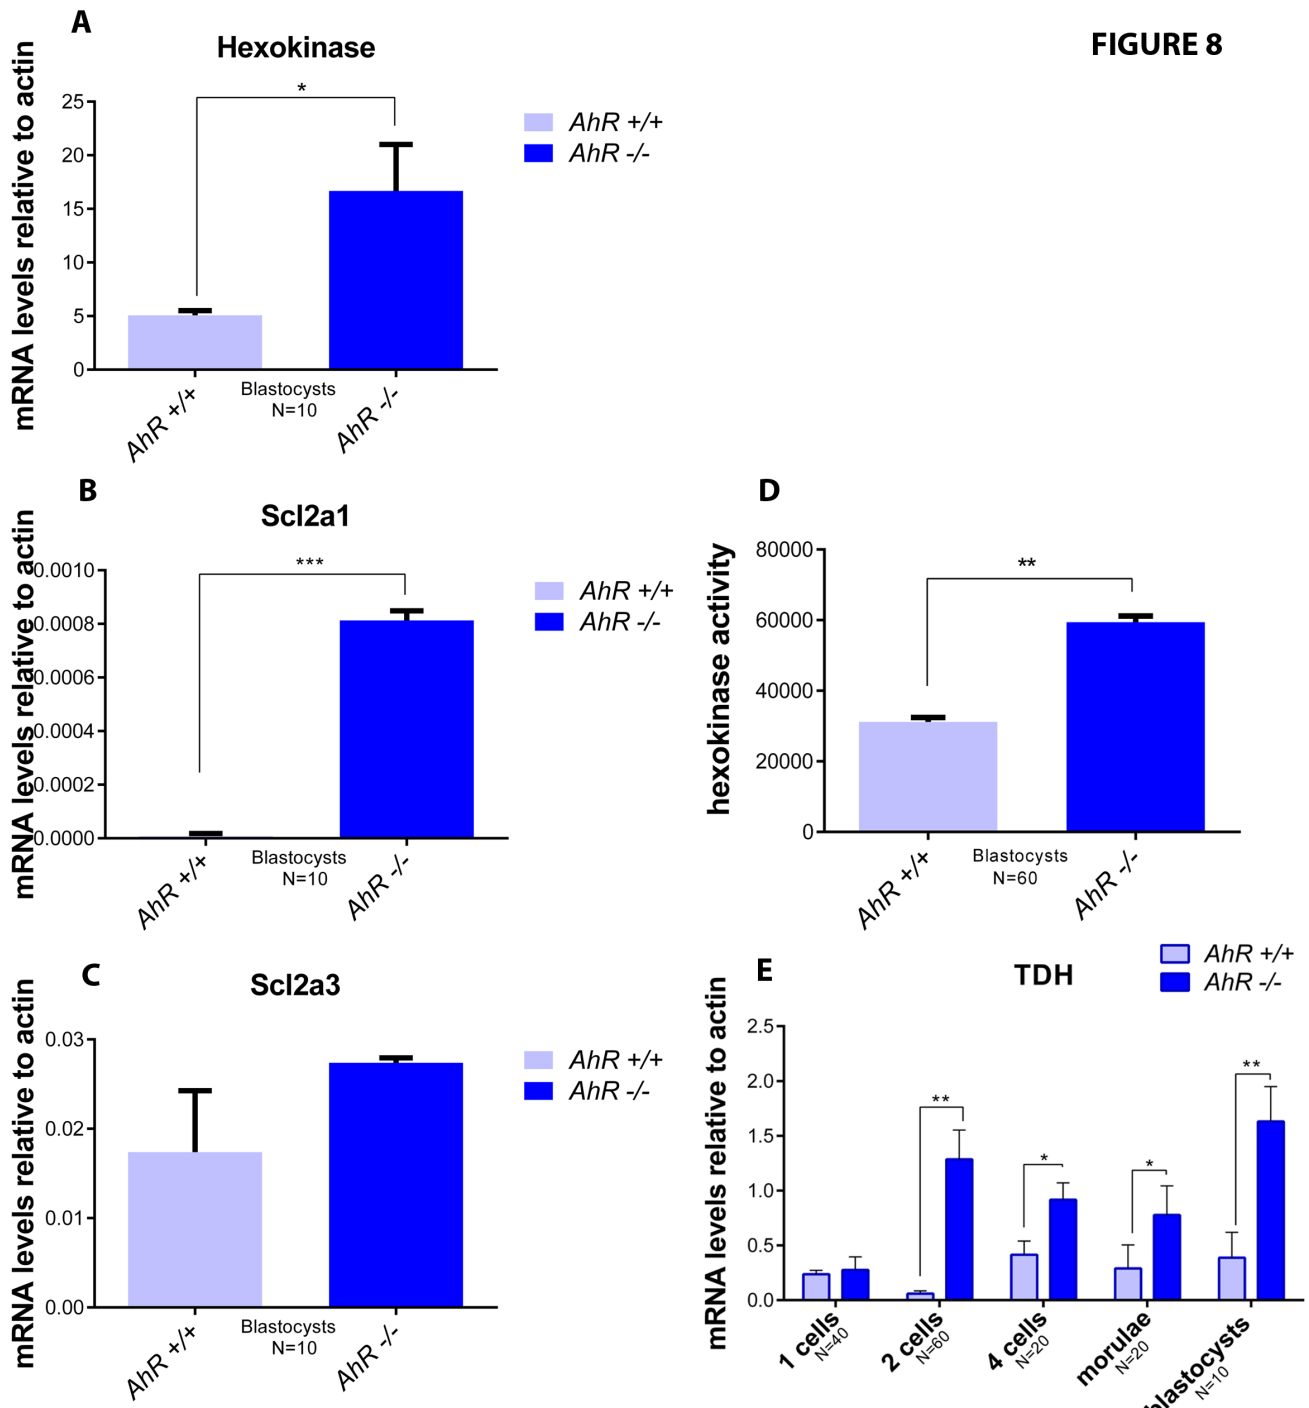

Supplementary Figure 2. AhR depletion favors a glycolytic metabolism. mRNA was purified from *AhR*<sup>+/+</sup> and *AhR*<sup>-/-</sup> blastocysts and the expression of *Hexokinase-HK* (A), *Scl2a1* (B) and *Scl2a3* (C) was quantified by RT-qPCR. Expression levels were normalized by  $\beta$ -Actin and represented as  $2^{-\Delta\Delta C_t}$ . (D) Hexokinase activity was measured using pools of 25-30 embryos at the morulae to blastocyst stages by an enzymatic assay. (E) Threonine dehydrogenase expression was analyzed at the indicated developmental stages in *AhR*<sup>+/+</sup> and *AhR*<sup>-/-</sup> embryos. \* $p < 0.05$ ; \*\* $p < 0.01$ ; \*\*\* $p < 0.001$ . Data are shown as mean  $\pm$  SD. The experiments were performed, at least, 4 times (2 times for D panel) and the number of embryos analyzed is indicated in the x axis.

**Supplementary Table S1**  
**Oligonucleotide sequences used for mRNA expression analysis**

| Gene                                     | Sequence 5'-- 3'                                                  |
|------------------------------------------|-------------------------------------------------------------------|
| <b><i>AhR</i></b>                        | Fw: ACATCACCTACGCCAGTCGC<br>Rv: TCTATGCCGCTTGGGAAGGAT             |
| <b><i>Nanog</i></b>                      | Fw: CAAGGGTCTGCTACTGAGATGCTCTG<br>Rv: TTTTGTGGGGACTGGTAGAAGAATCAG |
| <b><i>Oct4</i></b>                       | Fw: AGAGGGAACCTCCTCTGAGC<br>Rv: CCAAGGTGATCCTCTTCTGC              |
| <b><i>Sox2</i></b>                       | Fw: CGTAAGATGGCCCAGGAGAA<br>Rv: GCTTCTCGGTCTCGGACAAA              |
| <b><i><math>\beta</math>-catenin</i></b> | Fw: GTGCAATTCCTGAGCTGACA<br>Rv: CTAAAGATGGCCAGCAAGC               |
| <b><i>Lats1</i></b>                      | Fw: GACCCAGCTAATGGACAAA<br>Rv: GTTGCAGTCCAGGGACATT                |
| <b><i>Lats2</i></b>                      | Fw: GTGTCCACAAGATGGGCTTT<br>Rv: CTCCATGCTGTCCTGTCTCA              |
| <b><i>Cdx2</i></b>                       | Fw: TCTCCGAGAGGCAGGTTAAA<br>Rv: GCAAGGAGGTCACAGGACTC              |
| <b><i>Gata3</i></b>                      | Fw: CCGAAACCGGAAGATGTC<br>Rv: TCAGCATGTGGGTGGAGT                  |
| <b><i>Mtch1</i></b>                      | Fw: CAGAATCCAGGTTCCAGTT<br>Rv: TCAGGTA CTCCAGCAGTGG               |
| <b><i>Sc12a1</i></b>                     | Fw: CCCAGAAGGTTATTGAGGA<br>Rv: GGTTCCATCATCAGCATGGAG              |
| <b><i>Sc12a3</i></b>                     | Fw: CTTATGGGATTCGCCAAGAT<br>Rv: TACCAGAATCCCAACAACGA              |
| <b><i>Tdh</i></b>                        | Fw: AAGCTTGTCTTGCCCTTGAA<br>Rv: CTTCCCAAATCGTTTCCTCA              |
| <b><i>Hexokinase</i></b>                 | Fw: TGTTCCGAGAAGATGGTGAGC<br>Rv: CATACGTGCTGGACCGATAC             |
